# Supplementary material
Source: publisher figshare collection journal article supplement (https://geolsoc.figshare.com/ndownloader/files/13310528)
Supplement: Supplementary file 1 [file 13310528]

|  | GSR1  (Analytical value) | G2  (Analytical value) |
| --- | --- | --- |
| SiO2 | 72.38 | 69.53 |
| TiO2 | 0.28 | 0.47 |
| Al2O3 | 13.91 | 15.17 |
| Fe2O3 | 1.97 | 2.56 |
| MnO | 0.06 | 0.03 |
| MgO | 0.32 | 0.64 |
| CaO | 1.60 | 1.99 |
| Na2O | 3.27 | 4.07 |
| K2O | 4.99 | 4.48 |
| P2O5 | 0.10 | 0.15 |
| SUM | 98.88 | 99.09 |
| LOI | 0.75 | 0.67 |
| Ba | 356 | 1905 |
| Cr | 6 | 12 |
| V | 23 | 36 |
| Sc | 5.8 | 5 |
| Co | 4.7 | 4.6 |
| Ni | 3 | 5 |
| Cu | 1 | 12 |
| Zn | 26 | 80 |
| Ga | 18 | 24 |
| Pb | 37 | 31 |
| Th | 56 | 24 |
| U | 18.5 | 1.6 |
| Rb | 468 | 163 |
| Sr | 107 | 474 |
| Y | 68 | 14 |
| Zr | 162 | 318 |
| Nb | 39 | 10 |

**Major and trace elements reference values**

|  | GH (Granite)  (Analytical value) | BHVO-1(Basalt)  (Analytical value) |
| --- | --- | --- |
| La | 26.01 | 16.269 |
| Ce | 61.24 | 39.92 |
| Pr | 7.94 | 5.83 |
| Nd | 29.32 | 25.71 |
| Sm | 9.21 | 6.36 |
| Eu | 0.13 | 2.14 |
| Gd | 9.87 | 6.46 |
| Tb | 1.92 | 0.98 |
| Dy | 12.16 | 5.38 |
| Ho | 2.96 | 1.02 |
| Er | 8.22 | 2.44 |
| Tm | 1.34 | 0.33 |
| Yb | 8.05 | 2.08 |
| Lu | 1.13 | 0.29 |

**Rare Earth Elements reference values**
